RESEARCH ARTICLE

# Photolysis of Low-Brominated Diphenyl Ethers and Their Reactive Oxygen Species-Related Reaction Mechanisms in an Aqueous System

Mei Wang<sup>1</sup>, Huili Wang<sup>2</sup>, Rongbo Zhang<sup>1</sup>, Meiping Ma<sup>1\*</sup>, Kun Mei<sup>1</sup>, Fang Fang<sup>1</sup>, Xuedong Wang<sup>1\*</sup>

**1** Key Laboratory of Watershed Science and Health of Zhejiang Province, Wenzhou Medical University, Wenzhou 325035, China, **2** College of Life Sciences, Wenzhou Medical University, Wenzhou 325035, China

\* [zjuwxd@163.com](mailto:zjuwxd@163.com) (XW); [mmp@wzmc.edu.cn](mailto:mmp@wzmc.edu.cn) (MM)

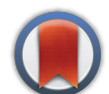

CrossMark  
click for updates

## OPEN ACCESS

**Citation:** Wang M, Wang H, Zhang R, Ma M, Mei K, Fang F, et al. (2015) Photolysis of Low-Brominated Diphenyl Ethers and Their Reactive Oxygen Species-Related Reaction Mechanisms in an Aqueous System. *PLoS ONE* 10(8): e0135400. doi:10.1371/journal.pone.0135400

**Editor:** Karl Rockne, University of Illinois at Chicago, UNITED STATES

**Received:** April 14, 2015

**Accepted:** July 21, 2015

**Published:** August 14, 2015

**Copyright:** © 2015 Wang et al. This is an open access article distributed under the terms of the [Creative Commons Attribution License](https://creativecommons.org/licenses/by/4.0/), which permits unrestricted use, distribution, and reproduction in any medium, provided the original author and source are credited.

**Data Availability Statement:** All relevant data are within the paper and its Supporting Information files.

**Funding:** This work was jointly supported by the National Natural Science Foundation of China (21377100), the Natural Science Foundation of Zhejiang Province (LY13D010006 and LY15B070009), and the Analyzing and Testing Project of Zhejiang Province (2015C37006 and 2015C37033).

**Competing Interests:** The authors have declared that no competing interests exist.

## Abstract

To date, no report was concerned with participation of reactive oxygen species in waters during photolysis of low-brominated diphenyl ethers (LBDEs). Herein, we found that electron spin resonance (ESR) signals rapidly increased with increasing irradiation time in the solution of LBDEs and 4-oxo-TMP solutions. But this phenomenon did not occur in the presence of  $\text{NaN}_3$  ( $^1\text{O}_2$  quencher) demonstrating generation of  $^1\text{O}_2$  in process of LBDEs photolysis. The indirect photolytic contribution rate for BDE-47 and BDE-28 was 18.8% and 17.3% via  $^1\text{O}_2$ , and 4.9% and 6.6% via  $\cdot\text{OH}$ , respectively. Both  $\text{D}_2\text{O}$  and  $\text{NaN}_3$  experiments proved that the indirect photolysis of LBDEs was primarily attributable to  $^1\text{O}_2$ . The bimolecular reaction rate constants of  $^1\text{O}_2$  with BDE-47 and BDE-28 were  $3.12$  and  $3.64 \times 10^6 \text{ M}^{-1} \text{ s}^{-1}$ , respectively. The rate constants for BDE-47 and BDE-28 ( $9.01$  and  $17.52 \times 10^{-3} \text{ min}^{-1}$ ), added to isopropyl alcohol, were very close to those ( $9.65$  and  $18.42 \times 10^{-3} \text{ min}^{-1}$ ) in water, proving the less indirect photolytic contribution of  $\cdot\text{OH}$  in water. This is the first comprehensive investigation examining the indirect photolysis of LBDEs in aqueous solution.

## Introduction

Polybrominated diphenyl ethers (PBDEs), used as an additive in brominated flame retardants, have been widely used in textile, electronic, food and home furnishing products [1–3]. There are 209 kinds of congeners, which are divided into low-brominated diphenyl ethers (LBDEs, containing one to six bromine atoms) and high-brominated diphenyl ethers (HBDEs, containing seven to ten bromine atoms). HBDEs can be transformed into LBDEs through various environmental reactions, especially by photolytic processes, leading to LBDEs being the most frequently detected congeners in real-world environmental matrices [4,5]. Among LBDEs, the predominant congeners are BDE-153, BDE-47 and BDE-28, which account for approximately 70–80% of total PBDEs in general people and the exposure of infants via breast feeding in

Beijing [6]. In recent years, LBDE exposure in human breast milk, animal tissues and bloods have been reported in many studies [6,7]. Schröter-Kermani et al. [8] reported that the concentration of BDE-47 in milk samples from the USA had a median concentration of 18  $\mu\text{g kg}^{-1}$  lipid. Concentrations of tetra- to hexa-brominated congeners in freshwater fish fillets in the USA ranged from <5 to 47,900  $\mu\text{g kg}^{-1}$  (lipid basis) [9]. LBDEs are more toxic and bioaccumulative than HBDEs [10,11]. Chronic exposure of LBDEs to organisms can lead to liver tumors, developmental neurotoxicity and thyroid dysfunctions [12]. LBDEs depress thyroid development as well as the long-term learning and memory capabilities in adult rats [13,14].

Although LBDEs can undergo anaerobic and aerobic microbial degradation [15,16], the microbial degradation pathway is slow and inefficient. In contrast, photolysis by sunlight is generally considered the major pathway for LBDEs degradation in the environment [17], especially direct photolysis resulting from absorbance of the solar spectrum in the  $\lambda > 290$  nm range [11]. The current interpretation of these photolytic processes is exclusively based on the direct excitation of PBDEs to form singlet or triplet excited states that undergo C-Br cleavage of PBDEs (Eqs 1 and 2, where “\*” refers to the excited state, and superscripts “1” and “3” refer to singlet and triplet states, respectively) [18,19].

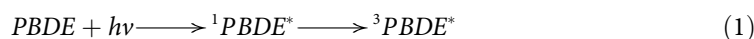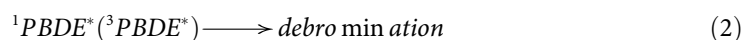

Fang et al. (2008) investigated the photolysis of five individual LBDEs (BDE-28, -47, -99, -100, and -153) in hexane and confirmed consecutive reductive debromination as the main degradation mechanism. Kuivikko et al. [17] predicted the photolytic half-lives in the mixing layer of the Baltic Sea and Atlantic Ocean using the photolytic quantum yields of BDE-47 and -99 in isooctane. In general, previous studies of LBDE photolysis were mostly performed in organic solvents or water-organic solvents [11,20–22], little data are available for natural waters because of the high hydrophobicity of LBDEs. However, the solvent has a strong effect on LBDE photolysis preventing direct extrapolation of results to aqueous environments. Eriksson et al. [11] made a tentative determination of photolytic kinetics of LBDEs in aqueous solutions containing 1% ethanol, but they inferred that the results were poor and that “due to its extremely low water solubility, photolytic experiments of LBDEs in the aqueous phase are practically impossible.” Suh et al. [18] confirmed that radical yields for PBDEs dissolved in tetrahydrofuran, dimethylformamide and toluene were about 9-, 4-, and 7-fold higher, respectively, than radical yields from the irradiated solvent alone. However, indirect photo-transformation of LBDEs with reactive oxygen species (ROS) remains uncertain in the aqueous phase. In organic solvents, reactive species such as  $\cdot\text{OH}$  and  ${}^1\text{O}_2$  will be more likely scavenged by the organic solvent that is more abundant and reactive than the target pollutant, and thus it may underestimate the power of ROS to degrade PBDEs in organic solvents. As a result, the indirect phototransformation of LBDEs with ROS requires rigorous investigation in aqueous environments in order to elucidate their real-world environmental behavior.

The main objective of this study was to elucidate the photolytic kinetics of LBDEs (BDE-47 and BDE-28) at concentrations representative of those observed in natural waters ( $\text{ng L}^{-1}$ ) and to investigate the related ROS-participating mechanisms. To achieve these objectives, the direct photolytic rate constant and quantum yield were measured for each single LBDE congener, and the indirect photolytic contribution due to  ${}^*\text{OH}$  and  ${}^1\text{O}_2$  participation was appraised in natural waters. Additionally, an electron spin resonance (ESR) technique was employed to verify the participation of ROS. Furthermore, the interaction between photolysis of LBDEs and HBDEs was investigated to determine their optimal ratio for rapid photodegradation of

LBDEs. To the best of our knowledge, this is the first comprehensive investigation examining the direct and indirect photolysis of LBDEs in aqueous solution. These results provide a theoretical foundation to explain mechanisms contributing to the high abundance of LBDEs, such as BDE-47 and BDE-28, in natural waters and for developing an optimal pathway for enhancing degradation of LBDEs in aquatic environments.

## Materials and Methods

### Reagents and chemicals

The following each single PBDE congener (at 50  $\mu\text{g mL}^{-1}$  in isooctane) was purchased from Accustandard (New Haven, CT, USA): 2,4,4'-tribrominated diphenyl ether (BDE-28), 2,2',4,4'-tetrabrominated diphenyl ether (BDE-47), 2,2',4,4',5-pentabrominated diphenyl ether (BDE-99), 2,2',4,4',5,5'-hexabrominated diphenyl ether (BDE-153), 2,2',4,4',5,6'-hexabrominated diphenyl ether (BDE-154), and 2,2',3,4,4',5,6-heptabrominated diphenyl ether (BDE-183). Sodium azide ( $\text{NaN}_3$ , 99.5%), Rose Bengal (RB, 93%) and furfuryl alcohol (FFA, 98%) were purchased from Sigma-Aldrich. Pyridine, *p*-nitroanisole (PNA) and isopropyl alcohol (IPA) were obtained from Aladdin. 2,2,6,6-tetramethyl-4-piperidone (TEMP, 95%, Sigma Aldrich) and 5,5-dimethyl-1-pyrroline-N-oxide (DMPO, 97%, Sigma Aldrich) were stored at  $-20^\circ\text{C}$  and used as the spin traps for  $^1\text{O}_2$  and  $\cdot\text{OH}/\text{O}_2\cdot$ , respectively. HPLC-grade acetonitrile and methanol were obtained from Merck Company (Darmstadt, Germany). All other chemical reagents were of analytical grade. Ultrapure water (18  $\text{M}\Omega$ ) was obtained from a Millipore Milli-Q water system.

### Photolytic experiments

Photolytic experiments were performed in a photochemical reactor (model BL-GHX-V, Shanghai BiLan Corporation, Shanghai, China). Water-refrigerated 300 W mercury and xenon lamps equipped with 290 nm cutoff filters were employed to provide UV-Vis irradiation ( $\lambda > 290$  nm). The simulated sunlight and light intensity in the center of the reactive solutions within the photochemical reactor were 10.6 and 1.5  $\text{mW}/\text{cm}^2$ , respectively (S1 Fig).

To study the photolytic mechanisms of PBDE degradation in water, the stock solutions of LBDEs and HBDEs (20  $\text{mg L}^{-1}$ ) were prepared in acetonitrile. A 35 mL volume with an initial concentration of 20  $\mu\text{g L}^{-1}$  was prepared by diluting the stock solution with ultrapure water into a quartz tube. All photolytic experiments were performed in triplicate, and a corresponding dark control was prepared by wrapping the quartz tube with aluminum foil to protect from light. During the irradiation experiments, aliquots (5 mL) of the sample were transferred into a glass test tube at given time intervals for dispersive liquid-liquid microextraction (DLLME). The quantum yield, representing the fraction of molecules absorbing a photon that are transformed/degraded, was determined using the established *p*-nitroanisole (PNA, 60  $\mu\text{M}$ ) with pyridine (6 mM) system.  $\text{NaN}_3$  (10 mM, quenchers of  $^1\text{O}_2$ ) and IPA (100 mM, quenchers of  $\cdot\text{OH}$ ) were added to the photoreaction solutions to investigate indirect photolytic mechanisms [23].

### Dispersive liquid-liquid microextraction (DLLME) procedures

A 5.0 mL aliquot containing PBDEs was placed into a 15 mL screw cap glass test tube with conical bottom (S2 Fig). A mixture of 1.0 mL acetonitrile (dispersive solvent) and 22.0  $\mu\text{L}$  1,1,2,2-tetrachloroethane (extraction solvent) was injected rapidly into the sample with a 2 mL syringe. The other centrifugation and retrieving procedures were referred to methods reported by Liu et al. [24,25].

## Determination of reaction rates between $^1\text{O}_2$ and LBDEs

To determine the  $^1\text{O}_2$  bimolecular reaction rate constants, 10  $\mu\text{M}$  RB (a  $^1\text{O}_2$  sensitizer) was added to solutions containing 20  $\mu\text{g L}^{-1}$  LBDEs (BDE-47 or BDE-28) and 200  $\mu\text{M}$  FFA in ultra-pure water under 300 W mercury lamp irradiation. The solutions were photolyzed in the solar simulator equipped with a 420 nm cutoff filter to limit the direct photolysis of LBDEs [23,26]. Aliquots (0.5 mL) of the solution were extracted at time intervals to detect the FFA concentration by HPLC as described below. The LBDE photolytic concentrations were analyzed by GC after they were extracted by liquid-liquid extraction using n-hexane as the extracting agent.

## Instrumental analyses

**HPLC analysis.** PNA and FFA were quantified using an Agilent HPLC-1260 system with a XDB-C<sub>18</sub> column (5  $\mu\text{m}$ , 150 mm  $\times$  4.6 mm) and UV/Vis detector. The optimized mobile phase for PNA was 50% acetonitrile-50% H<sub>2</sub>O, the flow rate was 0.8 mL min<sup>-1</sup>, and the detector wavelength was set at 300 nm. For FFA determination, the mobile phase was 20% acetonitrile-80% H<sub>2</sub>O with a flow rate of 0.8 mL min<sup>-1</sup> and the detector wavelength was set at 218 nm.

**Determination of PBDEs by GC.** PBDE analysis was performed using an Agilent 7890 GC (Agilent Technologies, Wilmington, DE, USA) equipped with a micro-electron capture detector ( $\mu\text{ECD}$ ). The GC system was coupled to a HP-5 capillary column (30 m  $\times$  0.32 mm I. D., 0.25  $\mu\text{m}$  film thickness, Agilent). Sample injections were performed in the splitless mode using an injection temperature of 290°C. The oven temperature was initially held at 110°C for 3 min, increased to 250°C for 5 min at 30°C min<sup>-1</sup>, and thereafter raised at 30°C min<sup>-1</sup> to 300°C, which was held for 3 min. Nitrogen (purity 99.999%) was employed as the carrier gas at a constant flow rate of 1.5 mL min<sup>-1</sup>, and the split flow was set at 60 mL min<sup>-1</sup>.

**Electron spin resonance (ESR) measurements.** ESR signals for  $^1\text{O}_2$  and  $\cdot\text{OH}$  trapped by TEMP and DMPO were recorded on a Bruker A300 spectrometer (Bruker, Germany) equipped with a 150 W mercury lamp as the irradiation light source. The setting of the ESR spectrometer was as follows: microwave frequency, 9.85 kHz; microwave power, 20.20 mW; modulation frequency, 100 kHz; and center field, 3514.66 G.

**UV-Vis absorption spectra.** The absorption spectra of LBDEs in aqueous solution were acquired on a Shimadzu UV-2600 spectrophotometer (Shimadzu Co. Japan).

## Results

### DLLME-GC determination of LBDEs and HBDEs

The optimal DLLME conditions for determination of LBDEs were 1.0 mL acetonitrile as disperser solvent, 22.0  $\mu\text{L}$  1,1,2,2-tetrachloroethane as extraction solvent, 30 s hand-shaking at ambient temperature and without salt addition. Under these conditions, the relative fortified recoveries ranged from 87.0 to 107.6% for BDE-28, -47, -99, -153, -154, and -183. Enrichment factors reached up to 268–305 and linearity was observed in the range of 0.1–50  $\mu\text{g L}^{-1}$ . A repeatability study was carried out by extracting the spiked water samples at a concentration level of 20  $\mu\text{g L}^{-1}$ , and the relative standard deviations varied between 3.8 and 6.3% ( $n = 5$ ). The limits of detection (LOD), based on a signal-to-noise ratio (S/N) of 3, were in the range of 8.1–28.2 ng L<sup>-1</sup> (S1 Table). These results indicate that this DLLME method can be successfully applied to the determination of LBDEs and HBDEs in environmental water samples.

### Photolytic kinetics of LBDEs

The photolytic rate constants ( $k$ ) increased with increasing substitution of bromine atoms on the benzene ring of PBDEs under 300 W xenon lamp irradiation (Table 1). The  $k$  values for

**Table 1. The estimated half-lives and rate constants for LBDEs under 300 W xenon lamp irradiation ( $\lambda > 290$  nm) in water.**

| Parameters                           | BDE-154               | BDE-153               | BDE-99                | BDE-47                |
|--------------------------------------|-----------------------|-----------------------|-----------------------|-----------------------|
| Rate constants ( $k, h^{-1}$ )       | $12.8 \times 10^{-2}$ | $11.0 \times 10^{-2}$ | $7.80 \times 10^{-2}$ | $4.63 \times 10^{-2}$ |
| Half-life ( $t_{1/2}, h$ )           | 5.38                  | 6.32                  | 8.88                  | 14.96                 |
| Coefficient of correlation ( $R^2$ ) | 0.9993                | 0.9996                | 0.9945                | 0.9962                |

doi:10.1371/journal.pone.0135400.t001

hexabromodiphenyl ether (BDE-153 and BDE-154) were about 2.5-fold greater than that for tetrabromodiphenyl ether (BDE-47). The number of substituted bromine atoms in the benzene ring can affect the absorption wavelength of congeners, and the less bromine atoms congeners possess, the lower their ability to absorb radiation (BDE-153 or BDE-154,  $\lambda_{max} = 297$ ; BDE-47,  $\lambda_{max} = 291$ ) [11]. The different number of substituted bromine atoms lead to different molecular structures and physicochemical properties of congeners. The highest occupied molecular orbital energy ( $E_{HOMO}$ ) increases as the number of bromine atoms increases, which lead to an increase of the debromination rate (BDE-154,  $E_{HOMO} = -9.534$  eV; BDE-153,  $E_{HOMO} = -9.400$  eV; BDE-99,  $E_{HOMO} = -9.338$  eV; BDE-47,  $E_{HOMO} = -9.329$  eV) [27]. In the BDE-153 photolytic process, BDE-99 and BDE-47 were observed as photolytic products (S3 Fig). Similarly, BDE-47 was the main photolytic product of BDE-154, as previously reported [27].

Similarly, the photolysis of BDE-47 and BDE-28 followed pseudo-first-order kinetics under 300 W mercury lamp irradiation ( $\lambda > 290$  nm) with rate constants of  $18.4 \times 10^{-3}$  ( $R^2 = 0.9909$ ) and  $9.65 \times 10^{-3} \text{ min}^{-1}$  ( $R^2 = 0.9955$ ), respectively, in water (Fig 1 and Table 2). Correspondingly, their half-lives were 37.7 and 71.8 min, respectively, which was different from Sanchez-Prado's report that the half-life time of BDE-47 undergoing aqueous photolysis was 4.16 min [28]. The  $k$  values for LBDEs increased with increasing bromine saturation in this study, which was in general agreement with that reported by Wei and coworkers [21]. Previous studies [11,17,29] have revealed that UVB and the shorter wavelength UVA radiation (ca. 310–320 nm) are responsible for the direct photochemical degradation of LBDEs in the environment. The difference of  $k$  values for LBDEs experiencing different radiation sources can be explained by greater overlap between the absorption spectra of the congeners and the mercury lamp radiation spectrum.

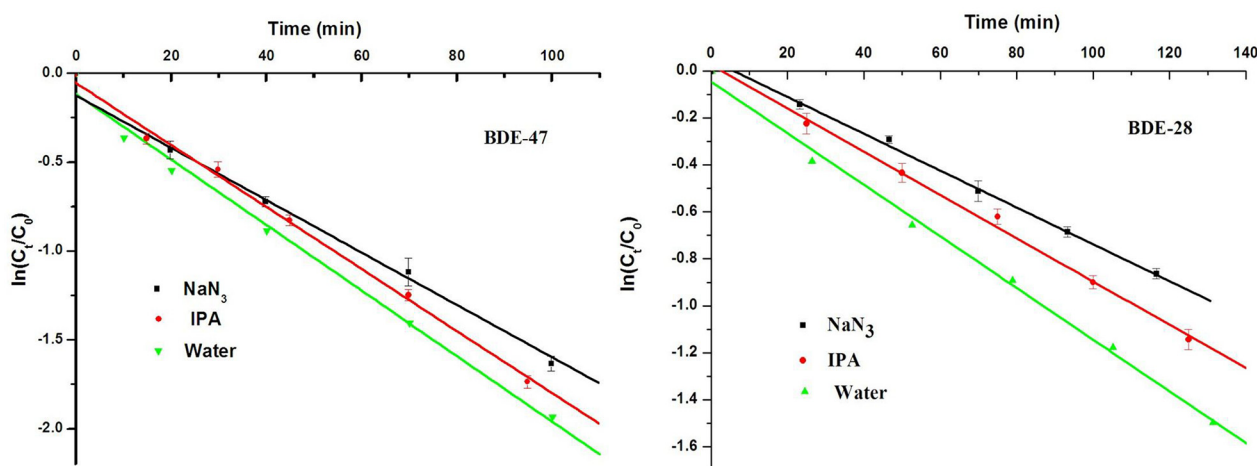

**Fig 1. Effects of  $\text{NaN}_3$  (10 mM) and isopropyl alcohol (100 mM) photolytic kinetics of BDE-47 and BDE-28 in ultrapure water under 300 W mercury lamp irradiation ( $\lambda > 290$  nm).**

doi:10.1371/journal.pone.0135400.g001

The previous studies concluded that BDE-47 photolysis in organic solvents occurs through a reductive debromination mechanism and its rate is largely related to the capacity of the solvent to provide a hydrogen atom to the aryl radical formed by hemolytic cleavage of a C-Br bond after molecular excitation by radiation [4,11,17,27]. In general, a greater ability of the solvent to provide hydrogen promotes a higher rate for the photolytic process [11,30]. Eriksson and coworkers found that BDE-47 photolysis was slower in methanol/water (80:20) than in methanol [11], in agreement with the lower tendency of water to provide a hydrogen atom. The H-O bond dissociation energy in water is 119 kcal mol<sup>-1</sup> while the C-H bond dissociation energy in water is 96 kcal mol<sup>-1</sup> [31]. However, other reaction processes may occur in LBDEs photolysis. Xie et al. [30] observed a fast photodegradation of BDE-209 in CCl<sub>4</sub> with a half-life only three times higher than that in THF, indicating that hydrogen-donating capacity of the solvent is not a major factor responsible for photolysis of BDE-209.

### Quantum yields of LBDEs in water

Quantum yield ( $\Phi$ ) is defined as the ratio between the amount of reactant consumed or product formed and the amount of photons absorbed. The  $\Phi$  values for LBDEs photolysis was calculated using the following equation [32,33]:

$$\Phi_{\text{substrate}} = \frac{k_{\text{substrate}} \sum(L_{\lambda} \epsilon_{\lambda})_{\text{actinometer}}}{k_{\text{actinometer}} \sum(L_{\lambda} \epsilon_{\lambda})_{\text{substrate}}} \Phi_{\text{actinometer}} \quad (3)$$

where  $\Phi_{\text{actinometer}}$  is the known quantum yield of the *p*-nitroanisole/pyridine actinometer,  $k_{\text{substrate}}$  and  $k_{\text{actinometer}}$  are the rate constants for the disappearance of substrate and actinometer,  $L_{\lambda}$  values (lamp irradiance at a specific wavelength) were measured with a monochromator (Acton, SP-300) (S4 Fig), and  $\epsilon_{\lambda}$  values are the molar absorptivities determined from UV/Vis spectra of the substrate (S5 Fig) or actinometer [33]. Because the solubility of LBDEs in water is very low, the determination of the molar absorptivity of LBDEs (10–20  $\mu\text{g L}^{-1}$ ) in aqueous solution is very imprecise and presents a high associated error. To overcome this problem, solutions of LBDEs with different concentrations were dissolved in pure ethanol and in ethanol/water (80:20 and 20:80) and analyzed by UV-Vis spectrometry [24]. The molar absorbance of BDE-47 in different ratios of ethanol to water was similar to that reported by Eriksson et al. [11] in tetrahydrofuran (S5 Fig). There were no significant differences in molar absorptivities of BDE-28 between pure ethanol and the two ethanol/water ratios (80:20 and 20:80). The average molar absorptivity of BDE-47 and BDE-28 in the 290–340 nm wavelength range is shown in S6 Fig. According to Eq (3), the  $\Phi$  values of BDE-47 and BDE-28 were 0.0479 and 0.0366, respectively. The calculated  $\Phi$  values of BDE-47 in water was much lower than the values (0.22) determined by Eriksson et al. [11] in methanol/water; however, it was the same value (0.22) reported by Kuivikko et al. [17] in isooctane. Fang et al. [34] investigated the  $\Phi$  values of 18 PBDE congeners substituted with 1–7 bromine atoms in hexane and ethanol under UV irradiation, and their values for BDE-47 and

**Table 2. Photolytic rate constants for PBDEs under 300 W mercury lamp irradiation ( $\lambda > 290$  nm).**

| Reactions                                                          | $k$ ( $\times 10^{-3}$ ) |        |
|--------------------------------------------------------------------|--------------------------|--------|
|                                                                    | BDE-28                   | BDE-47 |
| Photolysis in ultrapure water                                      | 9.65                     | 18.42  |
| Photolysis in ultrapure water containing 100 mM IPA                | 9.01                     | 17.52  |
| $\cdot\text{OH}$ -induced photolysis in ultrapure water            | 0.64                     | 0.90   |
| Photolysis in ultrapure water containing 5 mM NaN <sub>3</sub>     | 7.34                     | 14.05  |
| <sup>1</sup> O <sub>2</sub> -induced photolysis in ultrapure water | 1.67                     | 3.47   |

doi:10.1371/journal.pone.0135400.t002

BDE-28 ranged from 0.12 to 0.19 in both hexane and ethanol. To the best of our knowledge, there is a paucity of data concerning quantum yield for PBDEs in water. According to Eriksson et al. [11] and Xie et al. [30], the capacity of the solvent to be a “hydrogen donor” substantially increases the photolytic rate and quantum yield of organic chemicals. The results of our study are consistent with these findings with our  $\Phi$  values for BDE-47 and BDE-28 in water being much lower than those (0.12–0.19) in ethanol and hexane. In comparison, a highly polar solvent may quench the excitation state of organic chemicals, resulting in a low quantum yield [35]. As a result, the possible effect of the presence of acetonitrile in solution (0.1%) on LBDE photolysis should not be completely neglected. Acetonitrile present in solution can contribute to change the lifetime of the excited state or act as extra hydrogen source, changing the rate constant of LBDE photolysis. Thus, the calculated quantum yields of LBDEs in this work, although much more lower than the values in organic solvents [24], may still be overestimated.

## ROS-related indirect reaction mechanisms

**ESR detection of  $\cdot\text{OH}$  and  $^1\text{O}_2$ .** ESR spectroscopy together with spin trapping techniques and the application of state-of-the-art loop gap resonators was used to provide a direct measure of spontaneous oxygen radical production by homogenates of freshly isolated and cultured rat pancreatic islets. The spin-trapping method with 5,5-dimethyl-1-pyrroline N-oxide (DMPO) and 2,2,6,6-tetramethyl-4-piperidone (TEMP) has been widely accepted to measure the  $\cdot\text{OH}$  and  $^1\text{O}_2$  scavenging activity of a compound in ESR spectroscopy, respectively. When the ESR signal of the DMPO-OH adducts decreases or disappears, it can be concluded that  $\cdot\text{OH}$  is scavenged by the additive, or that its formation is suppressed by the additive only by supporting observations [36]. Bektasoglu et al. [37] investigated the second-order reaction rate constant of  $\cdot\text{OH}$  and mannitol, an  $\cdot\text{OH}$  scavenger, was  $0.6 \times 10^9 \text{ M}^{-1} \text{ s}^{-1}$ . In the absence of TEMP, the  $^1\text{O}_2$  lifetime was 85  $\mu\text{s}$ , while addition of TEMP shortened the  $^1\text{O}_2$  lifetime with  $Kq = 1.3 \times 10^9 \text{ M}^{-1} \text{ s}^{-1}$ , suggesting TEMP could knock out the formation of  $^1\text{O}_2$  [38]. Oxidation of TEMP (2,2,6,6-tetramethylpiperidine) by  $^1\text{O}_2$  yields the TEMPO (2,2,6,6-tetramethyl-1-piperidinyloxy) free radical easily detected by EPR (S7 Fig) [39].

ESR and spin-trap techniques were applied to probe singlet oxygen ( $^1\text{O}_2$ ) and hydroxyl radicals ( $\cdot\text{OH}$ ) trapped by TEMP (0.02 M) and DMPO (0.05 M) [40–42]. ESR signals consisting of a 1:1:1 triplet were observed in the irradiation of LBDEs and 4-oxo-TMP solutions, which was attributed to the nitroxide radical adduct, 4-oxo-TEMP [40]. The intensity of the 4-oxo-TEMP signals rapidly increased with increasing irradiation time and reached a maximum after about 8 min of irradiation (Fig 2). The signal was then reduced from the maximum which was attributed to the disappearance of LBDEs when irradiated below 290 nm. To confirm that the formation of nitroxide was due to  $^1\text{O}_2$  reaction,  $\text{NaN}_3$  (sodium azide) was added to the LBDE and TEMP mixtures. The ESR signal of the nitroxide radical did not increase in the presence of  $\text{NaN}_3$  during the photolytic process (Fig 2b and 2d), which indicated that formation of the 4-oxo-TEMP spin adduct was greatly suppressed due to the quenching of  $^1\text{O}_2$  by  $\text{NaN}_3$ .

ESR signals consisting of a 1:2:2:1 quartet pattern indicated that the DMPO-OH adduct was produced by irradiation of BDE-47 [43] (Fig 3c). However, only a weak DMPO-OH signal was observed after 12 min irradiation of BDE-47. When the BDE-47 solution was kept in the dark or irradiated with addition of isopropyl alcohol (IPA), no DMPO-OH signals were found (Fig 3b and 3c), which confirms that the ESR signal of DMPO-OH was formed via  $\cdot\text{OH}$  reaction. These results confirm that the photolysis of BDE-47 and BDE-28 involved both direct and indirect reaction mechanisms. Additionally, the indirect photolysis is dominantly attributable to  $^1\text{O}_2$  rather than  $\cdot\text{OH}$  [44]. In summary, we used ESR to demonstrate the formation of free radicals during the photodegradation of LBDEs in aqueous solutions.

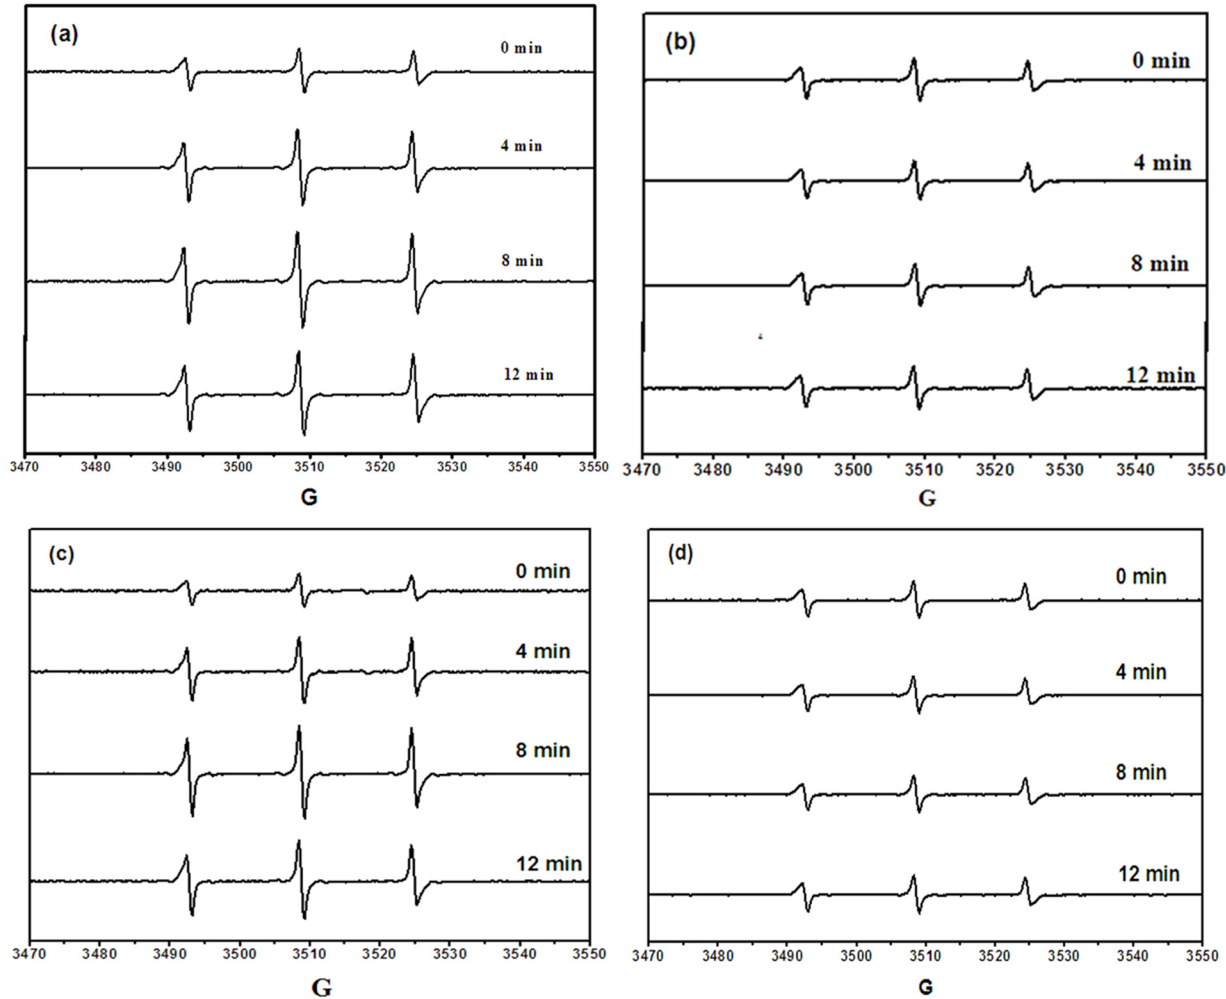

**Fig 2. ESR spectra obtained at ambient temperature from the irradiation of LBDE solutions.** Note: (1) The initial concentrations were  $20 \mu\text{g L}^{-1}$  for LBDEs,  $0.02 \text{ mol L}^{-1}$  for TEMP, and  $10 \text{ mM}$  for sodium azide; (2) Irradiation time was 12 min; (3) Spectrum a and b for BDE-47; spectrum c and d for BDE-28.

doi:10.1371/journal.pone.0135400.g002

**Indirect photolytic contribution by ROS quencher.** To further determine whether LBDEs underwent self-sensitized photo-oxidation via ROS, a series of quencher experiments were performed. IPA ( $100 \text{ mM}$ ) and  $\text{NaN}_3$  ( $10 \text{ mM}$ ), which were used to scavenge  $\cdot\text{OH}$  and  $^1\text{O}_2$ , respectively, were added to the irradiated BDE-47 and BDE-28 solutions under  $300 \text{ W}$  mercury lamp irradiation. The addition of  $\text{NaN}_3$  in ultrapure water induced a pronounced inhibition of BDE-47 and BDE-28 photolytic rates under irradiation ( $\lambda > 290 \text{ nm}$ ). In contrast, IPA had little effect on the photolytic rates of BDE-47 and BDE-28 (Fig 1). The contribution of indirect photolysis due to reaction with  $\cdot\text{OH}$  ( $R_{\cdot\text{OH}}$ ) and  $^1\text{O}_2$  ( $R_{^1\text{O}_2}$ ) during the LBDE photolysis process was calculated by Eqs (4) and (5):

$$R_{\cdot\text{OH}} = \frac{k_{\cdot\text{OH}(PW)}}{k_{PW}} = \frac{k_{PW} - k_{PW+IPA}}{k_{PW}} \quad (4)$$

$$R_{^1\text{O}_2} = \frac{k_{^1\text{O}_2(PW)}}{k_{PW}} = \frac{k_{PW+IPA} - k_{PW+\text{NaN}_3}}{k_{PW}} \quad (5)$$



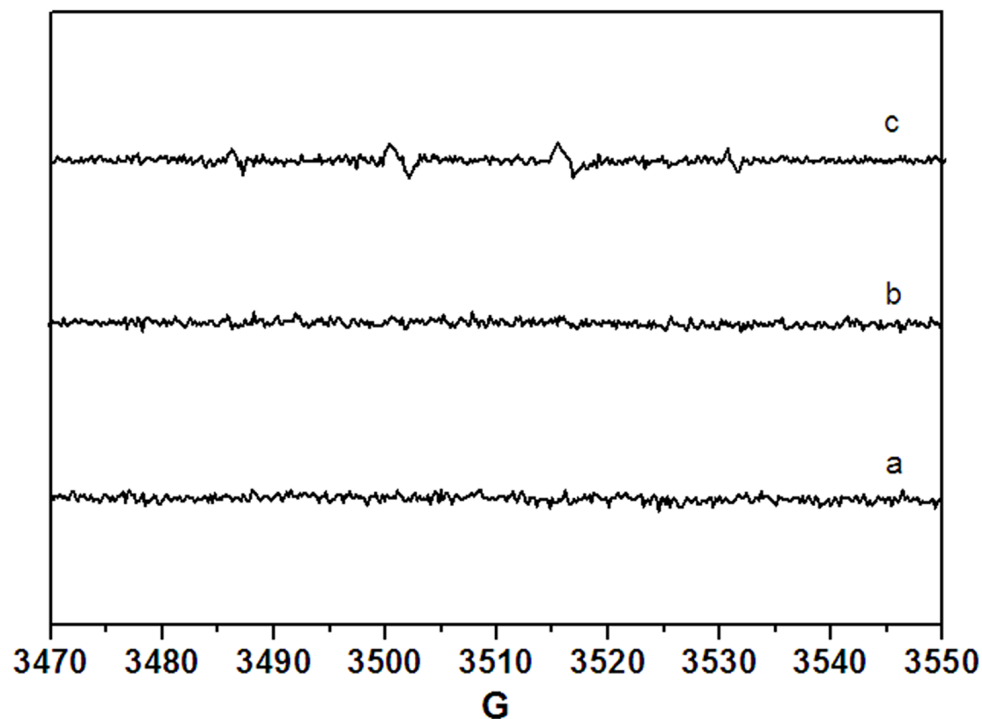

**Fig 3. ESR spectra of  $\cdot\text{OH}$  spin-trapping with DMPO ( $0.05 \text{ mol L}^{-1}$ ) from the irradiation of BDE-47 ( $20 \mu\text{g L}^{-1}$ ) solution in ultrapure water.** Note: (a) in dark; (b) after 12 min of irradiation with addition of IPA ( $100 \text{ mM}$ ); (c) after 12 min of irradiation with DMPO.

doi:10.1371/journal.pone.0135400.g003

As summarized in Table 2,  $k_{PW}$ ,  $k_{PW+IPA}$  and  $k_{PW+NaN_3}$  describe the photolytic kinetics of LBDEs in pure water and with the addition of IPA and  $\text{NaN}_3$  in pure water, respectively.  $k_{^1\text{O}_2(PW)}$  and  $k_{\cdot\text{OH}(PW)}$  correspond to the photolytic kinetics for  $^1\text{O}_2$ -induced and  $\cdot\text{OH}$ -induced LBDE photolysis, respectively [42,44]. Table 2 lists the reaction rate constants for BDE-47 and BDE-28 with different solution conditions. The indirect photolytic contribution rates in BDE-47 photo-oxidation process via  $^1\text{O}_2$  and  $\cdot\text{OH}$  were 18.8% and 4.9%, respectively. In comparison, those for BDE-28 were 17.3% and 6.6%, respectively. In the presence of IPA, the photolytic rate constants of BDE-47 and BDE-28 were  $9.01 \times 10^{-3}$  and  $17.52 \times 10^{-3} \text{ min}^{-1}$ , which were very close to those  $9.65 \times 10^{-3}$  and  $18.42 \times 10^{-3} \text{ min}^{-1}$  in ultrapure water (without IPA). These findings further demonstrated that indirect photolysis of LBDEs was primarily attributable to  $^1\text{O}_2$  rather than  $\cdot\text{OH}$ .

**Singlet oxygen reaction rate constants.** To determine the rate constant for  $^1\text{O}_2$ , the concentrations of LBDEs and FFA were measured during irradiation in the presence of RB as a photosensitizer for  $^1\text{O}_2$  production. FFA was recommended as a highly soluble, efficient trapping agent for singlet oxygen determinations in natural waters because its rose Bengal-sensitized photooxygenation was well documented [45,46]. The rate constant of the FFA reaction with singlet oxygen ( $k_{\text{FFA}}$ ) was determined to be  $1.2 \times 10^8 \text{ M}^{-1} \text{ s}^{-1}$  [23,45]. The reaction produced 6-hydroxy(2H)pyran-3(6H)-one (pyranone) in an 85% yield [45] (S8 Fig). The loss of LBDEs by reaction with  $^1\text{O}_2$  was simultaneously monitored with that of the reference compound, FFA. The bimolecular reaction rate constant of LBDEs and  $^1\text{O}_2$  ( $k_{\text{rxn}}$ ) [47–49] was determined using the ratio of the slope obtained from a plot of substrate degradation versus

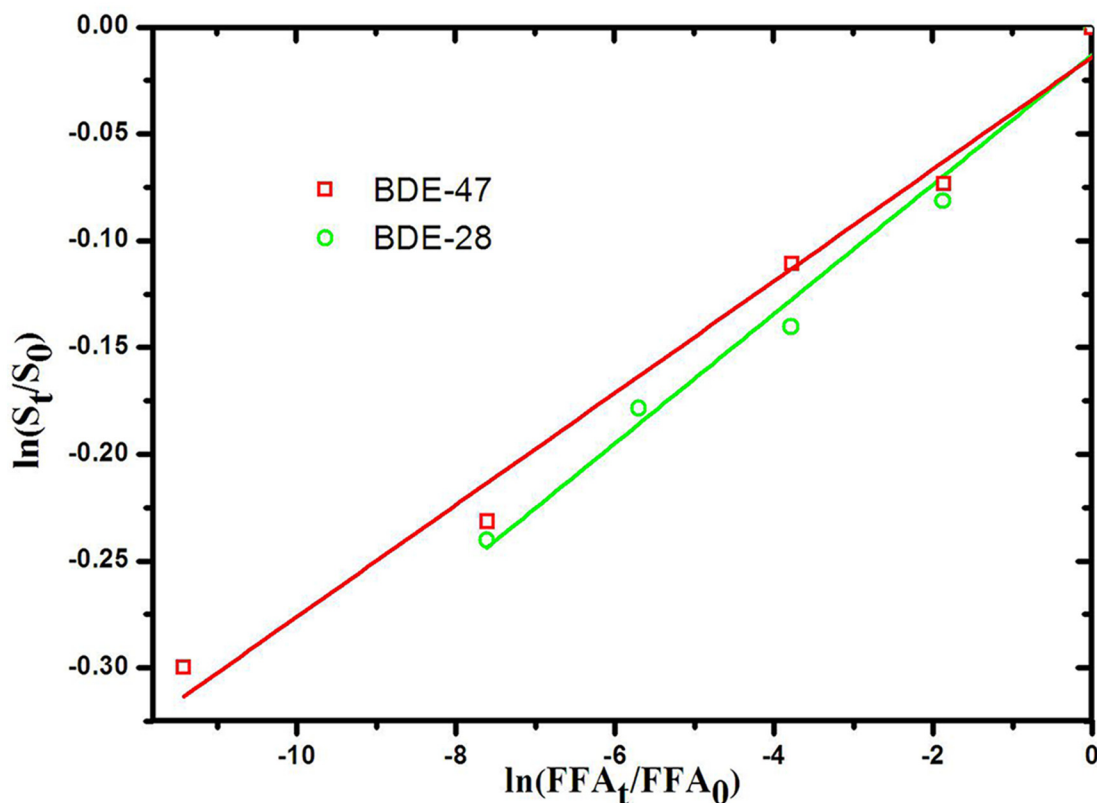

**Fig 4. Loss of BDE-47 or BDE-28 versus loss of furfuryl alcohol in the presence of rose bengal in the solar simulator.** Note: No direct photolysis in dark control.

doi:10.1371/journal.pone.0135400.g004

that of FFA degradation as follows:

$$\ln \frac{[S]_t}{[S]_0} = \frac{k_{rxn,s}}{k_{rxn,FFA}} \ln \frac{[FFA]_t}{[FFA]_0} \quad (6)$$

The bimolecular reaction rate constants for <sup>1</sup>O<sub>2</sub> with BDE-47 and BDE-28 were 3.12 ± 0.02 × 10<sup>6</sup> M<sup>-1</sup> s<sup>-1</sup> and 3.64 ± 0.04 × 10<sup>6</sup> M<sup>-1</sup> s<sup>-1</sup>, respectively (Fig 4). As reported in previous studies [49,50], the average <sup>1</sup>O<sub>2</sub> level in natural waters is ~10<sup>-13</sup> M. Based on these data, the calculated *K* values for the reaction of <sup>1</sup>O<sub>2</sub> with BDE-47 and BDE-28 were 3.12 × 10<sup>-7</sup> s<sup>-1</sup> and 3.64 × 10<sup>-7</sup> s<sup>-1</sup>, respectively. Tratnyek and coworkers found that an increase in chlorine substitution suppressed the singlet oxygen rate constants of chlorophenols [51]. Although the *k* value for the reaction of <sup>1</sup>O<sub>2</sub> with BDE-47 was a little lower than for BDE-28 in this investigation, further research is required to confirm if the *k* value is a function of the degree of bromine substitution with a corresponding suppression of the <sup>1</sup>O<sub>2</sub> rate constants for LBDEs.

**Photolysis of BDE-47 in D<sub>2</sub>O aqueous solution.** Since <sup>1</sup>O<sub>2</sub> has a longer lifetime in deuterated solvents, reaction rates in 100% D<sub>2</sub>O will be faster than in 100% H<sub>2</sub>O if degradation is due entirely to <sup>1</sup>O<sub>2</sub> [52]. Therefore, if the reaction with <sup>1</sup>O<sub>2</sub> is the principal pathway for self-sensitized transformation of LBDEs, the rate constants should be significantly increased in D<sub>2</sub>O compared to H<sub>2</sub>O [53]. Under the above-mentioned experimental conditions, the degradation rate of BDE-47 in D<sub>2</sub>O showed enhancement by >20% when compared to that in H<sub>2</sub>O (Fig 5). The above results demonstrated that <sup>1</sup>O<sub>2</sub> is a major factor responsible for indirect BDE-47 photolysis, which was in agreement with the results obtained by NaN<sub>3</sub> experiments.

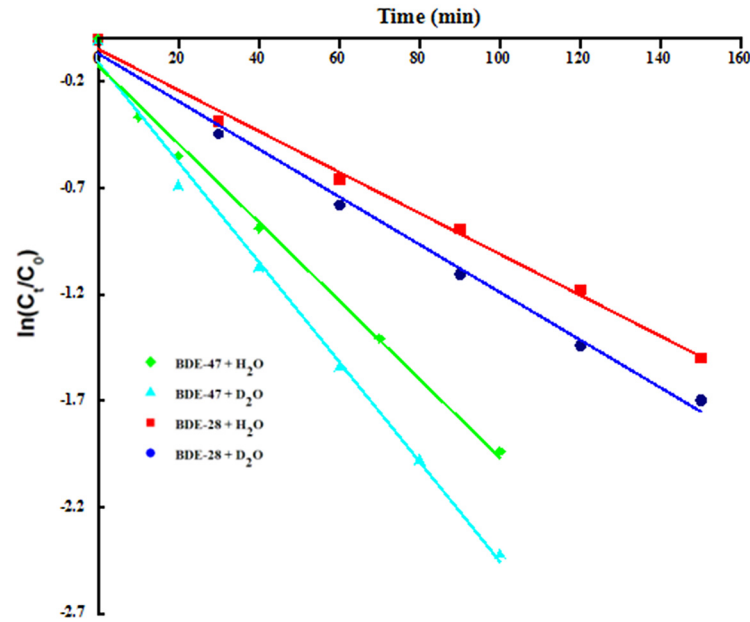

**Fig 5. Effect of D<sub>2</sub>O on the photolytic rate of BDE-47 and BDE-28 in aqueous solutions under 300 W mercury lamp irradiation ( $\lambda > 290$  nm).**

doi:10.1371/journal.pone.0135400.g005

## Supporting Information

**S1 Fig. Photochemical reactor system.** The photodegradation experiments were performed in a quartz vessel with cover and magnetic stirring. A lamp (BiLon Corporation, Shanghai, China) equipped with cutoff filters was employed to provide irradiation. The 290 nm and 420 nm cutoff filters provided radiation in the range of 290 nm to 700 nm and 420 nm to 700 nm, respectively.

(TIF)

**S2 Fig. Dispersive liquid-liquid microextraction (DLLME) procedure.**

(TIF)

**S3 Fig. BDE-153 photoproducts at different irradiation times.**

(TIF)

**S4 Fig. Relative irradiance of the 300 W mercury lamp and the 300 W Xenon lamp and transmittance of the 290 nm cutoff filter.** The light source irradiance spectra were measured with a monochromator (Acton, SP300).

(TIF)

**S5 Fig. Molar absorptivity coefficient of BDE-47 (a) and BDE-28 (b) as a function of wavelength in different proportions of ethanol: water (v/v).**

(TIF)

**S6 Fig. Molar absorptivity averages for BDE-47 and BDE-28.**

(TIF)

**S7 Fig. EPR signal of the TEMPO radical.**

(TIF)

**S8 Fig. Reaction of FFA and singlet oxygen.**  
(TIF)

**S1 Table. The linearity and LOD for PBDEs assay.**  
(DOC)

## Acknowledgments

This work was jointly supported by the National Natural Science Foundation of China (21377100), the Natural Science Foundation of Zhejiang Province (LY13D010006 and LY15B070009), and the Analyzing and Testing Project of Zhejiang Province (2015C37006 and 2015C37033).

## Author Contributions

Conceived and designed the experiments: WX WH. Performed the experiments: WM ZR. Analyzed the data: MM. Contributed reagents/materials/analysis tools: MK FF. Wrote the paper: WM.

## References

1. de Wit CA, Herzke D, Vorkamp K. Brominated flame retardants in the Arctic environment trends and new candidates. *Sci Total Environ*. 2010; 408: 2885–918. doi: [10.1016/j.scitotenv.2009.08.037](https://doi.org/10.1016/j.scitotenv.2009.08.037) PMID: [19815253](https://pubmed.ncbi.nlm.nih.gov/19815253/)
2. Kajiwara N, akigami H. Emission behavior of hexabromocyclododecanes and polybrominated diphenyl ethers from flame-retardant-treated textiles. *Environ Sci Process Impacts*. 2013; 15: 1957–63. doi: [10.1039/c3em00359k](https://doi.org/10.1039/c3em00359k) PMID: [24056914](https://pubmed.ncbi.nlm.nih.gov/24056914/)
3. Li Y, Wang T, Hashi Y, Li H, Lin JM. Determination of brominated flame retardants in electrical and electronic equipments with microwave-assisted extraction and gas chromatography- mass spectrometry. *Talanta* 2009; 78: 1429–35. doi: [10.1016/j.talanta.2009.02.046](https://doi.org/10.1016/j.talanta.2009.02.046) PMID: [19362212](https://pubmed.ncbi.nlm.nih.gov/19362212/)
4. Shih YH, Wang CK. Photolytical degradation of polybromodiphenyl ethers under UV-lamp and solar irradiations. *J Hazard Mater*. 2009; 165: 34–8. doi: [10.1016/j.jhazmat.2008.09.103](https://doi.org/10.1016/j.jhazmat.2008.09.103) PMID: [18996643](https://pubmed.ncbi.nlm.nih.gov/18996643/)
5. Mai B, Chen S, Luo X, Chen L, Yang Q, Sheng G, et al. Distribution of polybrominated diphenyl ethers in sediments of the Pearl River Delta and adjacent South China Sea. *Environ Sci Technol*. 2005; 39: 3521–7. PMID: [15952354](https://pubmed.ncbi.nlm.nih.gov/15952354/)
6. Zhao Y, Zhang R, Zhang L. Polybrominated dipenyl ethers (PBDEs) in breast milk samples from Beijing in 2007. *Health Res*. 2010; 39: 326–30 (in Chinese).
7. Lin X, Li HF, He X. Automated online pretreatment and cleanup recycle coupled with high-performance liquid chromatography-mass spectrometry for determination of decabromo- diphenyl ether in human serum. *J Sep Sci*. 2012; 2553–8. doi: [10.1002/jssc.201200211](https://doi.org/10.1002/jssc.201200211) PMID: [23001885](https://pubmed.ncbi.nlm.nih.gov/23001885/)
8. Schröter-Kermani C, Helm D, Herrmann T, Papke O. The German environmental specimen bank application in trend monitoring of polybrominated diphenyl ethers in human blood. *Organohalogen Compd*. 2000; 47–9.
9. Hale RC, La Guardia MJ, Harvey EP, Mainor TM, Duff WH, Gaylor MO. Polybrominated diphenyl ether flame retardants in Virginia freshwater fish (USA). *Environ Sci Technol*. 2001; 35: 4585–91. PMID: [11770759](https://pubmed.ncbi.nlm.nih.gov/11770759/)
10. Qiu XH, Mercado-Feliciano M, Bigsby RM, Hites RA. Measurement of polybrominated diphenyl ethers and metabolites in mouse plasma after exposure to a commercial pentabromodiphenyl ether mixture. *Environ Health Perspect*. 2007; 115: 1052–8. PMID: [17637922](https://pubmed.ncbi.nlm.nih.gov/17637922/)
11. Eriksson J, Green N, Marsh G, Bergman A. Photochemical decomposition of 15 polybrominated diphenyl ether congeners in methanol/water. *Environ Sci Technol*. 2004; 38: 3119–25. PMID: [15224744](https://pubmed.ncbi.nlm.nih.gov/15224744/)
12. Siddiqi MA, Laessig RH, Reed KD. Polybrominated diphenyl ethers (PBDEs): new pollutants-old diseases. *Clin Med Res*. 2003; 1: 281–90. PMID: [15931321](https://pubmed.ncbi.nlm.nih.gov/15931321/)
13. He P, Wang A, Niu Q. Toxic effect of PBDE-47 on thyroid development, learning, and memory, and the interaction between PBDE-47 and PCB 153 that enhances toxicity in rats. *Toxicol. Ind Health*. 2011; 27: 279–88. doi: [10.1177/0748233710387002](https://doi.org/10.1177/0748233710387002) PMID: [20947653](https://pubmed.ncbi.nlm.nih.gov/20947653/)

14. Zhang H, Li X, Nie J, Niu Q. Lactation exposure to BDE-153 damages learning and memory, disrupts spontaneous behavior and induces hippocampus neuron death in adult rats. *Brain Res.* 2013; 1517: 44–56. doi: [10.1016/j.brainres.2013.04.014](https://doi.org/10.1016/j.brainres.2013.04.014) PMID: [23624224](https://pubmed.ncbi.nlm.nih.gov/23624224/)
15. Gereke A, Hartmann P, Heeb N, Kohler HP, Giger W, Schmid P, et al. Anaerobic degradation of decabromodiphenyl ether. *Environ Sci Technol.* 2005; 39: 1078–83. PMID: [15773480](https://pubmed.ncbi.nlm.nih.gov/15773480/)
16. He JZ, Robrock KR, Alvarez-Cohen L. Microbial reductive debromination of polybrominated diphenyl ethers (PBDEs). *Environ Sci Technol.* 2006; 40: 4429–34.
17. Kuivikko M, Kotiaho T, Hartonen K, Tanskanen A, Vähätalo AV. Modeled direct photolytic decomposition of polybrominated diphenyl ethers in the Baltic Sea and the Atlantic Ocean. *Environ Sci Technol.* 2007; 41: 7016–21. PMID: [17993142](https://pubmed.ncbi.nlm.nih.gov/17993142/)
18. Suh YW, Buettner GR, Venkataraman S, Treimer SE, Robertson LW, Ludewig G, UVA/B-induced formation of free radicals from decabromodiphenyl ether. *Environ Sci Technol.* 2009; 43: 2581–8. PMID: [19452920](https://pubmed.ncbi.nlm.nih.gov/19452920/)
19. Freccero M, Fagnoni M, Albini A. Homolytic vs heterolytic paths in the photochemistry of haloanilines. *J Am Chem Soc.* 2003; 125: 13182–90. PMID: [14570493](https://pubmed.ncbi.nlm.nih.gov/14570493/)
20. Huang A, Wang N, Lei M, Zhu L, Zhang Y, Lin Z, Yin D, Tang H. Efficient oxidative debromination of decabromodiphenyl ether by TiO<sub>2</sub>-mediated photocatalysis in aqueous environment. *Environ Sci Technol.* 2013; 47: 518–25. doi: [10.1021/es302935e](https://doi.org/10.1021/es302935e) PMID: [23199337](https://pubmed.ncbi.nlm.nih.gov/23199337/)
21. Wei H, Zou YH, Li A, Christensen ER, Rockne KJ. Photolytic debromination pathway of polybrominated diphenyl ethers in hexane by sunlight. *Environ Pollut.* 2013; 174: 194–200. doi: [10.1016/j.envpol.2012.11.035](https://doi.org/10.1016/j.envpol.2012.11.035) PMID: [23274447](https://pubmed.ncbi.nlm.nih.gov/23274447/)
22. Bendig P, Vetter W. Photolytical transformation rates of individual polybrominated-diphenyl ethers in technical octabromodiphenyl ether (DE-79). *Environ Sci Technol.* 2010; 44: 1650–5. doi: [10.1021/es903023m](https://doi.org/10.1021/es903023m) PMID: [20121183](https://pubmed.ncbi.nlm.nih.gov/20121183/)
23. Latch DE, Stender BL, Packer JL, Arnold WA, McNeill K. Photochemical fate of pharmaceuticals in the environment: Cimetidine and ranitidine. *Environ Sci Technol.* 2003; 37: 3342–50. PMID: [12966980](https://pubmed.ncbi.nlm.nih.gov/12966980/)
24. Leal JF, Esteves VI, Santos EB. BDE-209: Kinetic studies and effect of humic substances on photodegradation in water. *Environ Sci Technol.* 2013; 47: 14010–7. doi: [10.1021/es4035254](https://doi.org/10.1021/es4035254) PMID: [24245794](https://pubmed.ncbi.nlm.nih.gov/24245794/)
25. Liu X, Li J, Zhao Z, Zhang W, Lin K, Huang C, et al. Solid-phase extraction combined with dispersive liquid-liquid microextraction for the determination for polybrominated diphenyl ethers in different environmental matrices. *J Chromatogr A.* 2009; 1216: 2220–6. doi: [10.1016/j.chroma.2008.12.092](https://doi.org/10.1016/j.chroma.2008.12.092) PMID: [19168180](https://pubmed.ncbi.nlm.nih.gov/19168180/)
26. Scully FE, Hoigne J. Rate constants for reactions of singlet oxygen with phenols and other compounds in water. *Chemosphere.* 1987; 16: 681–94.
27. Fang L, Huang J, Yu G, Wang L. Photochemical degradation of six polybrominated diphenyl ether congeners under ultraviolet irradiation in hexane. *Chemosphere.* 2008; 71: 258–67. PMID: [17983642](https://pubmed.ncbi.nlm.nih.gov/17983642/)
28. Sánchez-Prado L, Lores M, Llompарт M, García-Jares C, Bayona JM, Cela R. Natural sunlight and sun simulator photolysis studies of tetra- to hexa-brominated diphenyl ethers in water using solid-phase microextraction. *J Chromatogr A.* 2006; 1124: 157–66. PMID: [16824536](https://pubmed.ncbi.nlm.nih.gov/16824536/)
29. Bezares-Cruz J, Jafvert CT, Hua I. Solar photodecomposition of decabromodiphenyl ether: Products and quantum yield. *Environ Sci Technol.* 2004; 38: 4149–56. PMID: [15352454](https://pubmed.ncbi.nlm.nih.gov/15352454/)
30. Xie Q, Chen J, Shao J, Chen C, Zhao H, Hao C. Important role of reaction field in photodegradation of deca-bromodiphenyl ether: Theoretical and experimental investigations of solvent effects. *Chemosphere* 2009; 76: 1486–90. doi: [10.1016/j.chemosphere.2009.06.054](https://doi.org/10.1016/j.chemosphere.2009.06.054) PMID: [19660780](https://pubmed.ncbi.nlm.nih.gov/19660780/)
31. Luo YR. *Handbook of Bond Dissociation Energies in Organic Compounds.* CRC Press: Boca Raton, FL; 2003. p380.
32. Dulin D, Theodore M. Development and evaluation of sunlight actinometers. *Environ Sci Technol.* 1982; 16: 815–20. doi: [10.1021/es00105a017](https://doi.org/10.1021/es00105a017) PMID: [22299793](https://pubmed.ncbi.nlm.nih.gov/22299793/)
33. Leifer A. *The Kinetics of Environmental Aquatic Photochemistry.* American Chemical Society: Washington DC; 1988. p304.
34. Fang L, Huang J, Yu G, Li X. Quantitative structure-property relationship studies for direct photolysis rate constants and quantum yields of polybrominated diphenyl ethers in hexane and methanol. *Ecotoxicol Environ Saf.* 2009; 72: 1587–93. doi: [10.1016/j.ecoenv.2008.09.013](https://doi.org/10.1016/j.ecoenv.2008.09.013) PMID: [18995905](https://pubmed.ncbi.nlm.nih.gov/18995905/)
35. Choi J, Choi W, Mhin BJ. Solvent-specific photolytic behavior of octachlorodibenzo- p-dioxin. *Environ Sci Technol.* 2004; 38: 2082–8. PMID: [15112810](https://pubmed.ncbi.nlm.nih.gov/15112810/)

36. Li LX, Abe Y, Kanagawa K, Usui N, Imai K, Mashino T, Mochizuki M, Miyata N. Distinguishing the 5,5-dimethyl-1-pyrrolineN-oxide (DMPO)-OH radical quenching effect from the hydroxyl radical scavenging effect in the ESR spin-trapping method. *Anal Chim Acta*. 2004; 512: 121–4.
37. Bektasoglu B, Esin Celik S, Ozyurek M, Guclu K, Apak R. Novel hydroxyl radical scavenging antioxidant activity assay for water-soluble antioxidants using a modified CUPRAC method. *Biochem Biophys Res Commun*. 2006; 345: 1194–200. PMID: [16716257](#)
38. Zang LY, Misra BR, Misra HP. EPR studies on the kinetics of quenching singlet oxygen. *Biochem Mol Bio Int*. 1995; 37: 1187–1195.
39. Lion Y, Delmelle M, Van De Vorst A. New method of detecting singlet oxygen production. *Nature*. 1976; 263: 442–3. PMID: [972689](#)
40. Zhan M., Yang X., Xian Q., Kong L., Photosensitized degradation of bisphenol A involving reactive oxygen species in the presence of humic substances. *Chemosphere*. 2006; 378–86. PMID: [16289215](#)
41. Yao Y, Mao Y, Huang Q, Wang L, Huang Z, Lu W, et al. Enhanced decomposition of dyes by hemin-ACF with significant improvement in pH tolerance and stability. *J Hazard Mater*. 2014; 264: 323–31. doi: [10.1016/j.jhazmat.2013.10.063](#) PMID: [24316804](#)
42. Zhu XD, Wang YJ, Liu C, Qin WX, Zhou DM. Kinetics, intermediates and acute toxicity of arsenic acid photolysis. *Chemosphere* 2014; 107: 274–81. doi: [10.1016/j.chemosphere.2013.12.060](#) PMID: [24405966](#)
43. Brezova V, Pigsova J, Havlinnova B, Dvoranova D, Durovic M. EPR study of photochemical transformations of triarylmethane dyes. *Dyes Pigm*. 2004; 61: 177–98.
44. Ge L, Chen J, Qiao X, Lin J, Cai X. Light-source-dependent effects of main water constituents on photodegradation of phenicol antibiotics: mechanism and kinetics. *Environ Sci Technol*. 2009; 43: 3101–7. PMID: [19534120](#)
45. Halladja S, ter Halle A, Aguer JP, Boulkamh A, Richard C. Inhibition of humic substances mediated photooxygenation of furfuryl alcohol by 2,4,6-trimethylphenol. Evidence for reactivity of the phenol with humic triplet excited states. *Environ Sci Technol*. 2007; 41: 6066–73. PMID: [17937283](#)
46. Haag WR, Hoigne J, Gassman E, Braun AM. Singlet oxygen in surface waters. Part 1: furfuryl alcohol as a trapping agent. *Chemosphere*. 1984; 13: 631–40.
47. Luo X, Zheng Z, Greaves J, Cooper WJ, Song W. Trimethoprim: Kinetic and mechanistic considerations in photochemical environmental fate and AOP treatment. *Water Res*. 2012; 46: 1327–36. doi: [10.1016/j.watres.2011.12.052](#) PMID: [22244271](#)
48. Boreen AL, Edhlund BL, Cotner JB, McNeill K. Indirect photodegradation of dissolved free amino acids: the contribution of singlet oxygen and the differential reactivity of DOM from various sources. *Environ Sci Technol*. 2008; 42: 5492–8. PMID: [18754466](#)
49. Xu HM, Cooper WJ, Jung GY, Song W. Photosensitized degradation of amoxicillin in natural organic matter isolate solutions. *Water Res*. 2011; 45: 632–8. doi: [10.1016/j.watres.2010.08.024](#) PMID: [20813393](#)
50. Vione D, Feitosa-Felizzola J, Minero C, Chiron S. Phototransformation of selected human-used macrolides in surface water: kinetics, model predictions and degradation pathways. *Water Res*. 2009; 43: 1959–67. doi: [10.1016/j.watres.2009.01.027](#) PMID: [19249811](#)
51. Tratnyek PG, Holgne J. Oxidation of substituted phenols in the environment: a QSAR analysis of rate constants for reaction with singlet oxygen. *Environ Sci Technol*. 1991; 25: 1596–04.
52. Merkel PB, Kearns DR. Radiationless decay of singlet molecular oxygen in solution. Experimental and theoretical study of electronic-to-vibrational energy transfer. *J Am Chem Soc*. 1972; 94: 7244–9.
53. Matheson IBC, Lee J, King AD. The lifetime of singlet oxygen ( $^1\Delta_g$ ) in heavy water, a revised value. *Chem Phys Lett*. 1978; 55: 49–55.
